# Supplementary material
Source: publisher figshare collection journal article supplement (https://tandf.figshare.com/ndownloader/files/15008219)
Supplement: Supplementary file 1 [file 15008219]

## **Supplementary material**

### **Results of sensitivity analyses**

In the first sensitivity analysis, where patients with missing data for IMF total were assigned a score of 40, the median (interquartile range (IQR)) for the total IMF score was 9 (4-18.5) at 1 year, 12 (4-40) at 2 years and 23 (8-40) at 5 years. Based on this, the underestimation of the median IMF score was 12.5 % at 1 year, 50 % at 2 years and 130 % at 5 years.

In the second sensitivity analysis, the last observation was carried forward for IMF total scores. In this analysis, the median (IQR) for the total IMF score was 9 (4-14.75) at 1 year, 9 (3-17) at 2 years and 11 (5-22.5) at 5 years. Based on this, the underestimation of the median IMF score was 12.5 % at 1 year and at 2 years, and 10 % at 5 years.

**Supplementary table S1.** Correlations\* between lower extremity function and other disease parameters

|                       | <b>HAQ-DI</b>                | <b>HAQ-DI-LE</b>            | <b>CRP</b>                   | <b>DAS28</b>                | <b>DAS</b>                  |
|-----------------------|------------------------------|-----------------------------|------------------------------|-----------------------------|-----------------------------|
| <b>IMF at 1 year</b>  | r=0.38<br>p<0.001<br>(n=99)  | r=0.45<br>p<0.001<br>(n=94) | r=0.25<br>p=0.015<br>(n=98)  | r=0.24<br>p=0.02<br>(n=96)  | r=0.18<br>p=0.08<br>(n=92)  |
| <b>IMF at 2 years</b> | r=0.43<br>p<0.001<br>(n=88)  | r=0.47<br>p<0.001<br>(n=84) | r=-0.011<br>p=0.92<br>(n=88) | r=0.17<br>p=0.11<br>(n=87)  | r=0.03<br>p=0.80<br>(n=83)  |
| <b>IMF at 5 years</b> | r= 0.58<br>p<0.001<br>(n=68) | r=0.57<br>p<0.001<br>(n=64) | r=0.47<br>p<0.001<br>(n=68)  | r=0.41<br>p=0.001<br>(n=66) | r=0.33<br>p=0.008<br>(n=62) |

\*Spearman's rank test

IMF: Index of Muscle Function; HAQ-DI: Health Assessment Questionnaire Disability Index; HAQ-DI LE: HAQ-DI for the lower extremities; CRP: C-reactive protein

**Supplementary table S2.** Lower extremity function in early RA; by joint swelling. Index of Muscle Function; Median (IQR)

| <b>1 Year visit</b> |                                       | <b>Synovitis present</b> | <b>Synovitis absent</b> | <b>No synovitis in lower extremities (n=51)</b> |
|---------------------|---------------------------------------|--------------------------|-------------------------|-------------------------------------------------|
|                     | <b>Knee joint (n=6)</b>               | 11 (9.2-13.2)            | 7 (3-13)                | 9 (3-15)                                        |
|                     | <b>Ankle joint (n=26)</b>             | 10 (3.8-13.2)            | 7 (3-12.5)              | 9 (3-15)                                        |
|                     | <b>Knee and/or ankle joint (n=28)</b> | 10 (4.5-13)              | 6 (3-13)                | 9 (3-15)                                        |
|                     | <b>MTP joint (n=34)</b>               | 6 (2-9.5)*               | 10 (4-13.5)             | 9 (3-15)                                        |
| <b>2 Year visit</b> |                                       | <b>Synovitis present</b> | <b>Synovitis absent</b> | <b>No synovitis in lower extremities (n=59)</b> |
|                     | <b>Knee joint (n=4)</b>               | 12 (2.5-17.8)            | 8 (3-14.8)              | 9 (3-15)                                        |
|                     | <b>Ankle joint (n=11)</b>             | 8 (4-17)                 | 8 (3-15)                | 9 (3-15)                                        |
|                     | <b>Knee and/or ankle joint (n=14)</b> | 10.5 (4-17.2)            | 8 (3-14.2)              | 9 (3-15)                                        |
|                     | <b>MTP joint (n=21)</b>               | 5 (2-12.5)**             | 9 (4-17)                | 9 (3-15)                                        |
| <b>5 Year visit</b> |                                       | <b>Synovitis present</b> | <b>Synovitis absent</b> | <b>No synovitis in lower extremities (n=50)</b> |
|                     | <b>Knee joint (n=4)</b>               | 15 (10.8-20)             | 9 (3.25-19.8)           | 8 (3-19.8)                                      |
|                     | <b>Ankle joint (n=10)</b>             | 13.5 (8.8-23.5)***       | 9 (3-18.2)              | 8 (3-19.8)                                      |
|                     | <b>Knee and/or ankle joint (n=13)</b> | 13 (9-20.5)****          | 8 (3-19)                | 8 (3-19.8)                                      |
|                     | <b>MTP joint (n=8)</b>                | 11.5 (0.2-25.5)          | 9.5 (5-19.8)            | 8 (3-19.8)                                      |

\*p=0.07 vs Synovitis absent \*\*p=0.06 vs Synovitis absent and p=0.12 vs No synovitis

\*\*\*p=0.12 vs Synovitis absent and p =0.12 vs No synovitis \*\*\*\*p=0.09 vs Synovitis absent

**Supplementary table S3.** Lower extremity function in early RA; by joint tenderness. Index of Muscle Function; Median (IQR)

| <b>1 Year visit</b> |                                       | <b>Tenderness present</b> | <b>Tenderness absent</b> | <b>No tenderness in lower extremities (n=48)</b> |
|---------------------|---------------------------------------|---------------------------|--------------------------|--------------------------------------------------|
|                     | <b>Knee joint (n=3)</b>               | 9*                        | 7 (3-12.5)               | 7.5 (3-11)                                       |
|                     | <b>Ankle joint (n=30)</b>             | 6 (4-12.2)                | 7.5 (3-12.2)             | 7.5 (3-11)                                       |
|                     | <b>Knee and/or ankle joint (n=30)</b> | 6 (4-12.2)                | 7.5 (3-12.2)             | 7.5 (3-11)                                       |
|                     | <b>MTP joint (n=37)</b>               | 8 (3-12.5)                | 7 (3-12)                 | 7.5 (3-11)                                       |
| <b>2 Year visit</b> |                                       | <b>Tenderness present</b> | <b>Tenderness absent</b> | <b>No tenderness in lower extremities (n=47)</b> |
|                     | <b>Knee joint (n=4)</b>               | 9 (2.5-24.5)              | 8 (3-15)                 | 10 (3-17)                                        |
|                     | <b>Ankle joint (n=22)</b>             | 8 (3-13)                  | 9 (3-17)                 | 10 (3-17)                                        |
|                     | <b>Knee and/or ankle joint (n=23)</b> | 8 (3-13)                  | 8.5 (3-16.2)             | 10 (3-17)                                        |
|                     | <b>MTP joint (n=30)</b>               | 8 (3-13)                  | 9 (3-16)                 | 10 (3-17)                                        |
| <b>5 Year visit</b> |                                       | <b>Tenderness present</b> | <b>Tenderness absent</b> | <b>No tenderness in lower extremities (n=41)</b> |
|                     | <b>Knee joint (n=3)</b>               | 14*                       | 9 (3-19.5)               | 9 (2.5-20)                                       |
|                     | <b>Ankle joint (n=10)</b>             | 12.5 (6.8-20.2)           | 9.5 (3-19.8)             | 9 (2.5-20)                                       |
|                     | <b>Knee and/or ankle joint (n=13)</b> | 14 (7.5-20.5)             | 9 (3-19)                 | 9 (2.5-20)                                       |
|                     | <b>MTP joint (n=16)</b>               | 14 (3.5-19.8)             | 9 (3.2-20.2)             | 9 (2.5-20)                                       |

\*n=3

**Supplementary table S4.** Relation between joint tenderness, age, sex and IMF total score at inclusion in the early RA cohort. Linear regression

|                            | <b>Crude</b> |                | <b>Multivariate*</b> |                |
|----------------------------|--------------|----------------|----------------------|----------------|
|                            | <b>β</b>     | <b>95 % CI</b> | <b>β</b>             | <b>95 % CI</b> |
| Age (per year)             | 0.35         | 0.26 to 0.44   | 0.39                 | 0.30 to 0.48   |
| Female sex                 | 1.00         | -2.63 to 4.64  | 2.80                 | -0.02 to 5.62  |
| Knee tenderness<br>(n=11)  | 3.13         | -2.40 to 8.67  | 1.42                 | -2.92 to 5.75  |
| Ankle tenderness<br>(n=35) | 4.04         | 0.51 to 7.56   | 2.23                 | -0.80 to 5.25  |
| MTP tenderness<br>(n=48)   | 1.47         | -1.93 to 4.87  | 2.33                 | -0.49 to 5.16  |

\*Adjusted for all variables in the table

**Supplementary figure S1.**

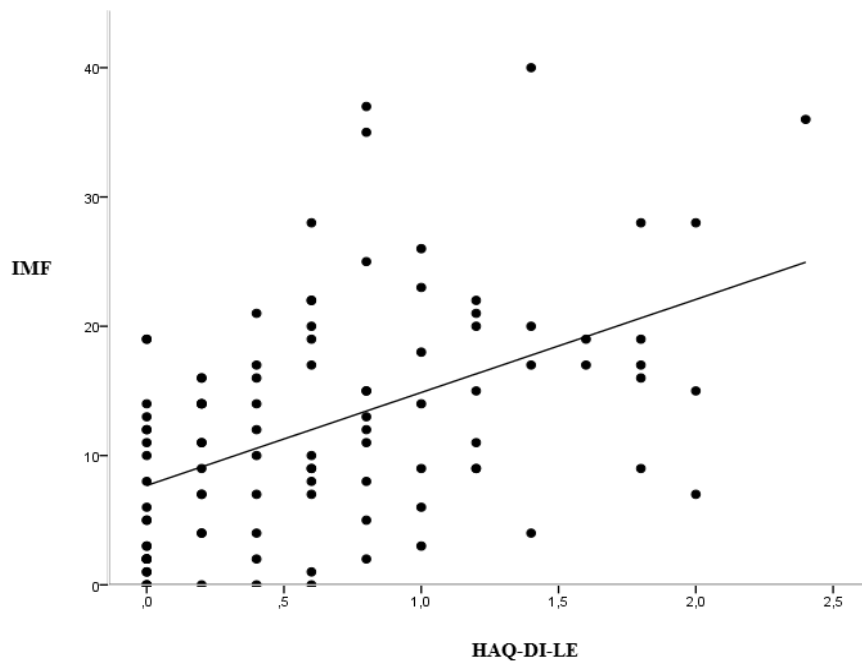

Correlation between IMF total and HAQ-DI-LE at inclusion.  $r=0.49$ ;  $p<0.001$  (Spearman's rank test).

IMF: Index of Muscle Function; HAQ-DI-LE: Health Assessment Questionnaire Disability Index for the lower extremities
